# 1 **EEG-based visual deviance detection in freely behaving mice**

2 Renate Kat<sup>a</sup>, Berry van den Berg<sup>b</sup>, Matthijs JL Perenboom<sup>c</sup>, Maarten Schenke<sup>d</sup>, Arn MJM  
3 van den Maagdenberg<sup>c,d</sup>, Hilgo Bruining<sup>e</sup>, Else A Tolner<sup>c,d\*</sup>, Martien JH Kas<sup>a\*</sup>

4 <sup>a</sup>Groningen Institute for Evolutionary Life Sciences (GELIFES), University of Groningen,  
5 Nijenborgh 7, 9747 AG, Groningen, the Netherlands, r.kat@rug.nl, m.j.h.kas@rug.nl

6 <sup>b</sup>Faculty of Behavioural and Social Sciences, Cognitive Neuroscience, Department of  
7 Experimental Psychology, University of Groningen, Grote Kruisstraat 2/1, 9712 TS,  
8 Groningen, the Netherlands, berry.van.den.berg@rug.nl

9 <sup>c</sup>Department of Neurology, Leiden University Medical Center, Albinusdreef 2, 2300 RC,  
10 Leiden, the Netherlands, M.J.L.Perenboom@lumc.nl,  
11 A.M.J.M.van\_den\_Maagdenberg@lumc.nl, E.A.Tolner@lumc.nl

12 <sup>d</sup>Department of Human Genetics, Leiden University Medical Center, Einthovenweg 20,  
13 2300 RC, Leiden, the Netherlands.

14 <sup>e</sup>Department of Child and Adolescent Psychiatry, Amsterdam University Medical Center,  
15 University of Amsterdam, Postbus 7057, 1007 MB, Amsterdam, the Netherlands,  
16 h.bruining@amsterdamumc.nl

17 \*These authors have contributed equally to this work

18

## 19 **Corresponding author:**

20 Prof. Dr. MJH Kas; Groningen Institute for Evolutionary Life Sciences (GELIFES),  
21 University of Groningen, Nijenborgh 7, 9747 AG Groningen, The Netherlands  
22 m.j.h.kas@rug.nl

**Abbreviations** ERP: event related potential; MMN: mismatch negativity; TFR: time-frequency  
reponse; V1: primary visual cortex; VEP: visual evoked potential

23 **Abstract**

24 The mouse is widely used as an experimental model to study visual processing. To probe  
25 how the visual system detects changes in the environment, functional paradigms in freely  
26 behaving mice are strongly needed. We developed and validated the first EEG-based  
27 method to investigate visual deviance detection in freely behaving mice. Mice with EEG  
28 implants were exposed to a visual deviant detection paradigm that involved changes in  
29 light intensity as standard and deviant stimuli. By subtracting the standard from the  
30 deviant evoked waveform, deviant detection was evident as bi-phasic negativity (starting  
31 around 70 ms) in the difference waveform. Additionally, deviance-associated evoked  
32 (beta/gamma) and induced (gamma) oscillatory responses were found. We showed that  
33 the results were stimulus-independent by applying a “flip-flop” design and the results  
34 showed good repeatability in an independent measurement. Together, we put forward a  
35 validated, easy-to-use paradigm to measure visual deviance processing in freely behaving  
36 mice.

37

38 **Keywords**

39 visual processing, mismatch negativity, sensory processing deficits

## 40 **1. Introduction**

41 The experiments by Hubel and Wiesel on direction selectivity of neurons in the cat visual  
42 cortex (Hubel, 1959; Hubel & Wiesel, 1968) have pioneered a growing scientific field on  
43 the visual system and its processing abilities. Since then, the mouse is a widely used  
44 animal model to investigate visual processing (Baker, 2013). One important reason is that  
45 mice are particularly suitable for genetic modification, such as the use of advanced  
46 genetically encoded tools for neuroimaging and neuromodulation that allow unravelling  
47 of neuronal network dynamics (Warden et al., 2014). Moreover, transgenic mouse  
48 models allow to examine the role of specific cell types or neuronal populations (Sohya et  
49 al., 2007; Hamm and Yuste, 2016), as well as to study altered visual processing in the  
50 context of human psychiatric disorders (Zhang et al., 2017; Hamm et al., 2020;  
51 Perenboom et al., 2020). However, visual processing has hardly been studied in awake,  
52 freely behaving mice, as typically head-fixation is used to ensure that visual stimuli reach  
53 the eye (Montijn et al., 2016; Carrillo-Reid et al., 2019; Fournier et al., 2020). Assessing  
54 measures of visual processing in freely moving mice requires a behavioural setup in  
55 which animals are constantly exposed to visual stimuli in their environment irrespective  
56 of their bodily position.

57 Detecting changes in the environment is an important function of sensory systems.  
58 The brain can shift attention to changes in the environment via either a passive reduction  
59 in the response to redundant stimuli, or an active memory-based increased response to  
60 unexpected, or deviant, stimuli (Garrido et al., 2009). The representation of deviance  
61 detection in the EEG signal has also been called mismatch negativity (MMN; May et al.,  
62 1999). Deficits in deviance detection have been associated with various neuropsychiatric  
63 disorders, mainly schizophrenia (Näätänen et al., 2014; Tada et al., 2019). In recent years

64 it has become clear that a homolog of the MMN is also present in the visual modality, the  
65 vMMN (Czigler, 2007; Kimura, 2012; Pazo-Alvarez et al., 2003). The vMMN has gained  
66 substantially less attention compared to auditory deviance detection and has only twice  
67 been studied in rodents (Hamm and Yuste, 2016; Vinken et al., 2017). While these studies  
68 were able to assess vMMN, the animals were required to be head-fixated.

69 Here we set out to develop a novel paradigm to measure deviance-induced  
70 differences in visual evoked potentials (VEPs) in freely behaving mice. Based on MMN  
71 oddball concepts used in the context of auditory deviance detection (Harms et al., 2016),  
72 our vMMN paradigm involves changes in light intensity as standard and deviant stimuli.  
73 In order to use the measured EEG waveform difference features for vMMN, the paradigm  
74 needs to comply with three principal criteria. First, the paradigm should be able to elicit  
75 a *robust deviance response* as measured through the difference between the deviant  
76 versus standard VEP responses. Second, the deviance response needs to be *stimulus-*  
77 *independent*, meaning that the same response difference is found when using either of the  
78 two stimuli - in our case increases versus decreases in light intensity - as deviant. Third,  
79 the VEP deviance effect needs to be repeatable in an independent measurement within  
80 the same subject (*repeatability*). After satisfying the three criteria based on VEP  
81 waveforms, characteristics of the frequency responses for the paradigm were explored  
82 to gain insight in visual deviance-induced oscillatory activity. In addition, the influence of  
83 the repeated light stimulation was explored by assessing how the strength of the  
84 observed vMMN changed with increasing number of standards preceding a deviant.

85

## 86 **2. Materials and Methods**

### 87 *2.1 Mice*

88 Male C57BL/6J mice (n=13) were used to implement and validate the newly developed  
89 vMMN paradigm. Animals were single-housed in individually ventilated cages for at least  
90 one week prior to surgeries and maintained on a 12:12 light-dark cycle with *ad libitum*  
91 access to food and water. All experiments were approved by the Animal Experiment  
92 Ethics Committee of Leiden University Medical Center and were carried out in accordance  
93 with ARRIVE guidelines and EU Directive 2010/63/EU for animal experiments. All efforts  
94 were made to minimize discomfort of the experimental animals.

### 95 *2.2 EEG implantation surgery*

96 Stereotactic EEG electrode implantation surgery was performed in mice at the age of 2  
97 months. Under isoflurane anaesthesia (1.5%, in oxygen-enriched air), three silver (Ag)  
98 ball-tip electrodes were implanted epidurally above the right prefrontal cortex (bregma  
99 +2.6 mm anterior, -1.6 mm lateral) and the right and left primary visual cortex (V1;  
100 bregma -3.5 mm posterior, +/- 3.0 mm lateral). The relatively lateral V1 position was  
101 chosen since multiple studies indicate a role for the visual extra-striate areas (which are  
102 located more laterally on the occipital cortex) in the vMMN (reviewed in: Kimura, 2012;  
103 Vinken et al., 2017). Two epidural platinum electrodes were placed above cerebellum to  
104 serve as reference and a ground electrode, respectively. Electromyogram (EMG)  
105 electrodes were placed on top of the neck muscles to record muscle activity. Light-  
106 activated bonding primer and dental cement (Kerr optibond / premise flowable, DiaDent  
107 Europe, Almere, the Netherlands) were used to attach electrodes to the skull. Post-  
108 operative pain relief was achieved by a subcutaneous injection of Carprofen (5 mg/kg).  
109 EEG recordings started after a 14-day recovery period.

### 110 *2.3 EEG and VEP recordings*

111 Tethered EEG recordings were performed in a Faraday cage in which animals were  
112 connected to the recording hardware via a counterbalanced, low-torque custom-build  
113 electrical commutator. Signals were three times pre-amplified, band-pass filtered (0.05  
114 to 500 Hz), then amplified 1200 times and thereafter digitized (Power 1401, Cambridge  
115 Electronic Devices, Cambridge, UK) at a sampling rate of 5000 Hz. For the recording of  
116 VEPs, mice were placed inside a computer-controlled custom-built LED-illuminated  
117 sphere in which tethered mice were able to move freely (Van Diepen et al., 2013). The  
118 sphere (30 cm diameter) was coated with high-reflectance paint that spread light  
119 produced by a ring of white monochromatic LEDs at the top of the sphere around an  
120 opening for the swivel. A baffle prevented the mice from looking directly into the LEDs.  
121 After connecting mice to the setup in the sphere, animals were allowed to habituate for  
122 at least 10 min. Mice were tested once in a baseline assessment and twice in an oddball  
123 paradigm, all on separate days. The baseline assessment, in which a train of light flashes  
124 of increasing intensity was presented to the animals, was performed to determine VEP  
125 signal quality. 60 flashes of 1 ms with increasing light intensity between  $\sim 0.4$  to  $1.1$   
126  $\mu\text{W}/\text{cm}^2/\text{nm}$  were presented at 2 Hz, and 5 flashes of increasing intensity between  $\sim 1.4$   
127 to  $2.2 \mu\text{W}/\text{cm}^2/\text{nm}$  at 0.5 Hz. The paradigm was repeated 50 times with 20 s rest in-  
128 between blocks.

#### 129 *2.4 Visual oddball paradigm*

130 To measure vMMN, a light intensity-based oddball paradigm with decreases and  
131 increases in light intensity was developed (Fig. 1). To ensure stable levels of light-  
132 adaptation before onset of the oddball sequence, the paradigm started with 10 min of  
133 constant light of medium intensity ( $0.15 \mu\text{W}/\text{cm}^2/\text{nm}$ ). Subsequently a 7-minute  
134 sequence started in which 300-ms pulses of increased ( $1.7 \mu\text{W}/\text{cm}^2/\text{nm}$ ) or decreased

135 light intensity ( $0.02 \mu\text{W}/\text{cm}^2/\text{nm}$ ) stimuli were interspersed by a 500-ms inter-stimulus  
136 interval of the  $0.15 \mu\text{W}/\text{cm}^2/\text{nm}$  constant light intensity (Fig. 1). The constant level of  
137 light in between the sequence of standard and deviant stimuli was used to prevent  
138 occurrence of dark adaptation between stimuli. The intensities of increases and  
139 decreases were chosen based on VEP amplitudes in the grand average baseline curve in  
140 such a way that the amplitude change from decrease to ISI level was the same as the  
141 amplitude change from ISI to increase level. The stimulus duration of 300 ms was based  
142 on earlier vMMN studies that used stimulus durations between 80 and 500 ms, in humans  
143 (Stagg et al., 2004; Kimura et al., 2010; Sulykos and Czigler, 2014) and rodents (Hamm  
144 and Yuste, 2016; Vinken et al., 2017). Deviant stimuli were semi-randomly spread  
145 through the sequence, with the constraint of a minimum of two standard presentations  
146 before the next deviant. The first stimulation block in the paradigm contained 500 stimuli,  
147 437 (87.4%, the standard) of which were intensity increases and 63 (12.6%, the deviant)  
148 of which were light intensity decreases. After this block, the paradigm (including the 10  
149 minutes constant light at the start) was repeated with a swap of standard and deviant  
150 stimulus type. This so called ‘flip-flop’ paradigm allowed for assessment of differences  
151 between standard and deviant stimuli irrespective of stimulus type (Harms et al., 2016),  
152 in our case increased vs decreased light intensity. The visual oddball paradigm was  
153 performed twice for every animal on separate days. Every animal was once tested in the  
154 morning (1<sup>st</sup> half of the light phase) and once in the afternoon (2<sup>nd</sup> half of the light phase),  
155 whereby the order of the morning and afternoon measurement was counterbalanced  
156 over the animals.

## 157 *2.5 Analysis*

158 No animals had to be excluded on the basis of low signal quality as judged from the  
159 baseline assessment of stimulus responses. For two animals, positive-negative inverted  
160 signals were evident on one of the visual cortex electrodes (once right V1 and once left  
161 V1); these electrodes were excluded from analysis. Next, recordings were manually  
162 checked to exclude recording periods with artefacts, as well as periods of sleep, as  
163 deviance detection is known to be attenuated or even absent in non-REM sleep  
164 (Sculthorpe et al., 2009). For sleep detection, recordings were first screened for the  
165 presence of periods where a passive infrared (PIR) motion detector did not pick up non-  
166 specific locomotor activity. If periods without locomotor activity were present, they were  
167 checked for the presence of non-REM sleep, as defined by high amplitude delta (<4 Hz)  
168 waves, so called slow waves, in the frontal EEG signal in combination with an absence of  
169 activity in the EMG signal. Two recordings which contained periods of sleep were  
170 excluded from EEG analysis (both being the first recording of the animal). Additionally,  
171 seven recordings were excluded from the analysis of locomotor activity, since sleep  
172 episodes were present in the baseline periods. For one animal both the first and the  
173 second recording were excluded due to the presence of sleep, this animal was thus not  
174 included in the locomotor activity analysis.

### 175 *2.5.1 VEP waveforms*

176 Data pre-processing was performed in Matlab (Versions 2018a & 2018b, MathWorks,  
177 Natick, MA, USA). EEG data were low-pass filtered at 70 Hz with a fourth order  
178 Butterworth filter. For evoked potential waveform analysis, VEPs were extracted from  
179 the data of each recording electrode from 50 ms before until 300 ms after stimulus onset.  
180 Subsequently, VEPs were grouped into deviant and standard stimuli, irrespective of  
181 being a light intensity increase or a light intensity decrease. Within those two categories,  
182 trials were averaged, and subsequently baseline corrected, using a latency window that



183 ranged from -50 to 0 to ms prior to the change in light intensity. For plotting purposes,  
184 all 437 standard trials were averaged. However, to have a balanced numbers of  
185 standards and deviants in the statistical comparisons, bootstrapping of 100 random sets  
186 of 63 standards was used in the statistical analysis. Difference waves were calculated by  
187 subtracting the standard from the deviant VEP. A comparison between the difference  
188 waves of the right and left V1 electrode (using cluster-based permutation analysis) did  
189 not reveal any time windows of significant differences (data not shown). In subsequent  
190 analyses VEPs from the right and left electrode were averaged. Averaging over trials,  
191 electrodes and recordings was performed for the data from individual animals before  
192 performing any statistical analysis for the data-sets across animals.

193 To test whether vMMN was significantly different from zero cluster-based  
194 permutation analysis was used as previously described (Maris and Oostenveld, 2007). In  
195 short, dependent *t*-test statistics were obtained for every time point (0.2-ms steps) of the  
196 difference waves and were clustered over time along adjacent points that reached above  
197 the *t*-value threshold corresponding to an alpha-level of 0.05. The sum of all *t*-values in  
198 a cluster was used as the cluster statistic. To assess significance of these clusters, a ‘null’  
199 distribution was created by performing 1000 random permutations with the individual  
200 animal difference waves and zero. Cluster statistics were extracted for every  
201 permutation in the same manner as described above. Both the largest positive and the  
202 largest negative cluster from each permutation were used to create two distributions.  
203 Clusters in the actual data were considered significant when exceeding the 97.5-  
204 percentile threshold for cluster size in either the positive or negative distribution. The  
205 permutation process was repeated for difference waves computed with each of the 100  
206 randomly selected subsets of 63 standards. The largest cluster for each component (the  
207 early (30-70 ms), the late (70-150 ms) and effects after vMMN latencies (> 150 ms)) was

208 saved into a p-value distribution of which the median, the maximum, the minimum and  
209 the percentage of p-values below alpha ( $p < 0.05$ ) were reported (median [min max],  
210 percentage). Medians were reported instead of means, because the p-values were not  
211 normally distributed. When no cluster was found, a value of 1 was added to the  
212 distribution.

213 Comparable procedures were used to compare VEP features between right and  
214 left electrodes, light intensity increases and decreases, and first and second recordings.  
215 However, in these cases permutations were performed by randomly exchanging the data  
216 between the two conditions in the comparison. As small numbers of clusters were found  
217 for the comparison of the first and second recording, for these data all clusters that were  
218 found in the bootstrap were pulled together; for the deviants, no bootstrap was used but  
219 all 63 deviants were simply compared between the first and second recording.

220 Cluster-based permutation analysis does not have a good level of precision for  
221 finding exact on- and off-sets, therefore borders of the time, as well as time-frequency,  
222 windows of reported clusters should be interpreted carefully (Sassenhagen and  
223 Draschkow, 2019). Latency windows plotted in the VEP figures display the windows as  
224 found by the analysis with all standards.

### 225 *2.5.2 Time-frequency analysis*

226 For analysis of time-frequency responses (TFRs), single trial data (i.e., from a single  
227 stimulation; either a standard or deviant) were extracted from the EEG signal from 1 s  
228 before to 1.5 s after stimulus onset. The data was low-pass filtered at 150 Hz. Like with  
229 the VEP analysis, trials were grouped into standards and deviants irrespective of the  
230 stimulus being a light increase or decrease. Using the FieldTrip toolbox for EEG/MEG-  
231 analysis (Oostenveld et al., 2011; Donders Institute for Brain, Cognition and Behaviour,

232 Radboud University, the Netherlands), Hanning window convolution was performed with  
233 5-ms time windows on single trials. Frequencies were extracted from 4 - 150 Hz with 1-  
234 Hz linear steps. The number of cycles increased from 2 to 10 with increasing frequency.  
235 Next, power was converted to a log<sub>10</sub> scale and an absolute baseline correction was  
236 performed using a window from 200 until 100 ms before stimulus onset as the baseline.  
237 This window was chosen to avoid including stimulus related activity that would be  
238 smeared (in time) due to the width of the Hanning window. The average time-frequency  
239 map of standard trials was subtracted from the average time-frequency map of deviant  
240 trials. Additionally, to assess non-phase-locked TFRs, per condition the *average* VEP  
241 response was subtracted from individual trials in the time domain before performing the  
242 same time-frequency analysis as described above (Cohen, 2014; Park et al., 2018). To test  
243 for statistical significance of clusters in the TFR difference maps, cluster-based  
244 permutation analysis was used as described above for VEP waveform analysis. T-test  
245 statistics were in this case obtained for every time-frequency point (5-ms and 1-Hz steps)  
246 and clustered over time and frequency. TFR analysis was performed with the full set of  
247 standards.

### 248 *2.5.3 Exploratory analysis of the effect of preceding number of standards*

249 To explore effects of the number of standards since the last deviant, in other words the  
250 number of preceding standards, on visual evoked EEG responses (both VEPs and TFRs)  
251 including vMMN amplitude, linear mixed effects modelling was performed (Bates et al.,  
252 2015a; Kuznetsova et al., 2017). Mixed models have a significant advantage over  
253 traditional regression models since they consider the number of individual trials that  
254 contribute to a condition, as opposed to calculating the unpooled means per animal, per  
255 condition, and losing this type of information (Gelman and Hill, 2007). Here, fewer

256 observations were available for the higher number of trials since the last deviant. Models  
257 were estimated and analyzed using the R-package '*lme4*' (Bates et al., 2015b, RStudio,  
258 version 1.2.5042 (R-version 4.0), Boston, MA, USA; lme4 package version 1.1-27; Bates et  
259 al., 2015b) and '*lmerTest*' (Kuznetsova et al., 2017).

260 The amplitude of the VEP waveforms and power of the TFRs were inspected as a  
261 function of the number of trials since the last deviant, for both standards and deviants,  
262 and light increases and decreases. The VEP waveform mean amplitudes were extracted  
263 from each individual trial in the latency windows that were found to be significant  
264 clusters in the evoked potential analysis, resulting in two separate models for an early  
265 (40 to 60 ms) and a late (70 to 150 ms) latency window. Similarly, the mean frequency  
266 power from each of the TFR clusters (across frequencies and time) that were found to be  
267 significant was also extracted. For each measurement type (mV or power) and interval,  
268 a linear mixed model was constructed with the following formula:

$$\begin{aligned} 269 \quad mV_n \mid \text{cluster power}_n \\ 270 \quad &= \beta_{0,j[n]} + \beta_1 \# \text{trials}_{j[n]} + \beta_2 \text{oddball}_{j[n]} + \beta_3 \text{stimulus}_{j[n]} \\ 271 \quad &+ \beta_4 \# \text{trials. oddball}_n + \beta_5 \text{oddball. stimulus}_n + \beta_6 \# \text{trials. stimulus} \\ 272 \quad &+ \beta_7 \# \text{trials. oddball. stimulus} + \epsilon_n \end{aligned}$$

273 In this formula, for each trial  $n$ , the VEP and TFR amplitudes were described by an  
274 intercept  $\beta_0$ , a  $\beta_1$  which indicates the number of trials since last deviant (1-30), a  $\beta_2$  which  
275 relates to whether the trial was a standard or a deviant and  $\beta_3$  which indicates whether  
276 the trial was a light increase or decrease. Finally,  $\beta_4 - \beta_7$  indicates the interactions  
277 between number of trials since the last deviant, whether a deviant or standard was  
278 presented, and whether the stimulus was a light increase or decrease and  $\epsilon_n$  is the  
279 residual error term. The subscript  $j[n]$  would indicate whether the model included a

280 random effect by animal. To establish the random-effects structure of the model we used  
281 a procedure in which we started with a full model (containing random slopes per animal  
282 for all corresponding fixed effects; including the interaction terms) and subsequently  
283 reduced model complexity by stepwise removing random factors (starting with the  
284 higher-order interaction terms) until the model did not improve (AIC selection criteria;  
285 (Bates et al., 2015a). This stepwise procedure has been shown to result in a ‘hybrid’  
286 model that avoids overfitting the data while containing relevant random effects (Luke,  
287 2017; Matuschek et al., 2017). As a result, the random effect per subject for the  
288 interaction between number of trials since last deviant and whether the trial was a  
289 deviant or standard was excluded. T-statistics were used to assess statistical significance  
290 of model parameters using the Satterthwaite estimation of degrees of freedom as  
291 implemented in the R-package ‘*lmerTest*’ (Kuznetsova et al., 2017).

#### 292 *2.5.4 Locomotor activity*

293 Locomotor activity of the mice during the vMMN paradigm was assessed by analyzing the  
294 activity counts recorded by a PIR movement sensor. Detected movement events were  
295 divided into baseline (20 minutes before stimulation and the 10-minute inter-block  
296 interval) and stimulation events. Events within stimulation blocks were further  
297 subdivided into events during the light increase standard block and the light decrease  
298 standard block. For all recordings without sleep episodes, the number of activity counts  
299 per minute were calculated per animals, combined over the first and (when applicable)  
300 second recording.

301 Differences in locomotor activity intervals between baseline and stimulation  
302 phases, as well as between standard increase and standard decrease blocks were tested  
303 with Wilcoxon ranked sum tests, as the data did not pass a one-sample Kolmogorov-

304 Smirnov test for normality.

305

306 VEP figures were constructed in GraphPad Prism (Version 8, GraphPad Software,  
307 San Diego, CA, USA). Figures of the TFR were constructed in Matlab (Version 2018a,b).  
308 Figures of the mixed linear modelling data were constructed in RStudio. Data in text are  
309 presented as mean  $\pm$  standard deviation. The type of variance presented in figures is  
310 specified in the figure legends. For all analyses  $p < 0.05$  was considered significant. All  
311 data and analysis code (R and Matlab) is available on the OSF data repository  
312 ([www.osf.io/6bhwf/](http://www.osf.io/6bhwf/)).

313

### 314 **3. Results**

#### 315 *3.1 Visual mismatch negativity can be assessed in freely behaving mice*

316 For the development of the vMMN paradigm for freely behaving mice, we designed an  
317 oddball paradigm with sequences of 300-ms white light pulses of increased (1.7  
318  $\mu\text{W}/\text{cm}^2/\text{nm}$ ) or decreased (0.2  $\mu\text{W}/\text{cm}^2/\text{nm}$ ) light intensity, interspersed by a 500-ms  
319 interstimulus interval at constant light of intermediate intensity (0.15  $\mu\text{W}/\text{cm}^2/\text{nm}$ , Fig.  
320 1). Deviant stimuli (63 of 500 stimuli, 12.6%) were semi-randomly spread throughout  
321 the sequence with the constraint of a minimum of two standard presentations before the  
322 next deviant. In the paradigm both increases and decreases in light intensity were  
323 presented once as standard and once as deviant ('flip-flop' paradigm; Harms et al., 2016,  
324 Fig. 1). The paradigm was presented twice, on separate days. For the first analysis, VEP  
325 responses were averaged for, respectively, all standard and deviant stimuli, regardless of  
326 being a response to a light increase or light decrease. VEPs recorded from the right and  
327 left primary visual cortex (V1), and the first and the second measurement were combined.

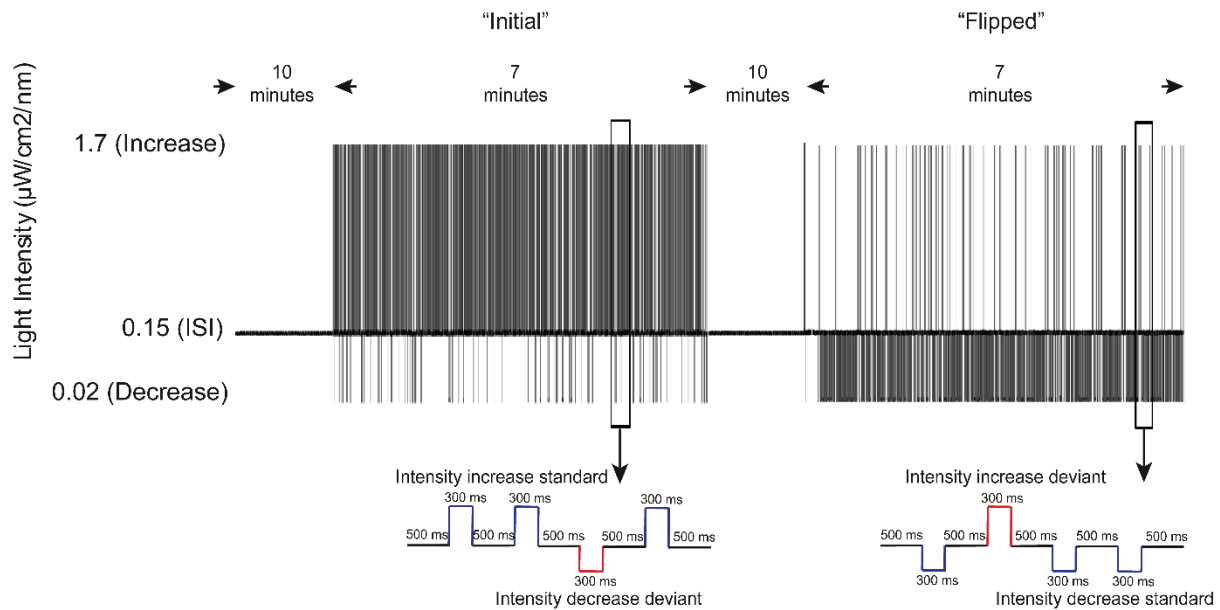

328

329 **Figure 1. Graphical representation of the light-intensity oddball paradigm used for visual mismatch**

330 **negativity in freely behaving mice.** Mice were presented with an oddball paradigm with increases (1.7

331  $\mu\text{W}/\text{cm}^2/\text{mm}$ ) and decreases (0.02  $\mu\text{W}/\text{cm}^2/\text{mm}$ ) in light intensity as stimuli, with intermittent

332 intermediate intensity levels (0.15  $\mu\text{W}/\text{cm}^2/\text{mm}$ ). The paradigm was presented as a ‘flip-flop’ in which the

333 “initial” presentation with intensity increase standards and intensity decrease deviants (left), was followed

334 by a “flipped” presentation with intensity decrease standards and intensity increase deviants (right). Initial

335 and flipped stimulation blocks lasted  $\sim 7$  min each. Before the initial stimulation block and in between the

336 initial and flipped stimulation blocks, 10 min of constant intermediate light (0.15  $\mu\text{W}/\text{cm}^2/\text{nm}$ ) was

337 presented. For the analysis, standards of increased intensity were compared to deviants of increased

338 intensity, and standards of decreased intensity are compared to deviants of decreased intensity.

339 Visual inspection of the averaged VEPs revealed a clear distinction between standard and

340 deviant waveforms (Fig. 2A). Both for deviant and standard stimuli, VEPs showed an

341 initial N1 negativity around 30 ms after stimulus onset, followed by a broad positivity

342 between  $\sim 50$  and  $\sim 150$  ms. Compared to the response to standard stimuli, the deviant

343 N1 deflection was slightly broadened, while the later broad positivity was of lower

344 amplitude than observed for the standard response. Consequently, the difference wave,

345 computed by subtracting the standard from the deviant response, consisted of a bi-phasic

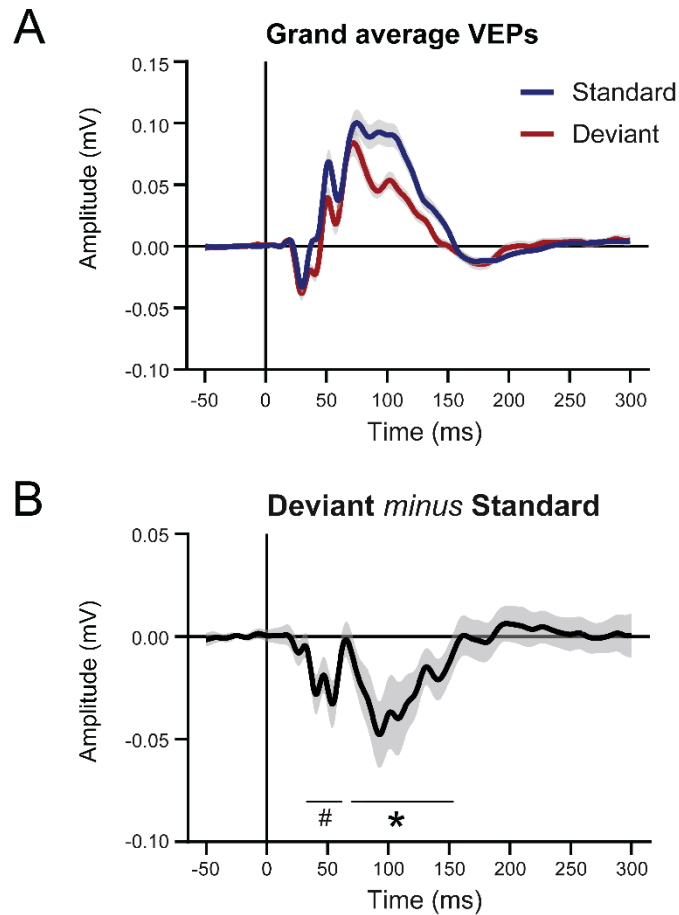

346

347 **Figure 2. Visual mismatch negativity in the visual evoked potential responses to an intensity oddball**  
348 **paradigm in freely behaving mice. (A)** Grand average VEP waveforms in response to standard and  
349 deviant stimuli. Responses were averaged for, respectively, all standard or all deviant stimuli, independent  
350 of the standard or deviant representing a stimulus of increased or decreased light intensity. Responses of  
351 the right and left V1, as well as the first and second recording were combined. Data are presented as mean  
352  $\pm$  standard error of the mean (SEM). **(B)** Deviant minus standard difference wave for the combined  
353 'intensity increase' and 'intensity decrease' deviants and standards. Data are presented as mean  $\pm$  95%  
354 confidence interval. Gray shading represents the variance between animals.  $n = 13$ ,  $*p < 0.01$ ,  $\#p < 0.1$ .

355 negative component, between  $\sim 35$  and  $\sim 150$  ms, with a maximum peak amplitude of -  
356  $0.048 \pm 0.027$  mV (Fig. 2B). Cluster-based permutation analysis revealed two deviance-  
357 associated components. The early negative component in the difference wave,  $\sim 35$ -60 ms  
358 after stimulus onset, was not significantly different from zero (median  $p = 0.069$ , [min:



359 0.024 max: 0.116], percentage < 0.05: 13%), whereas the late negative component, ~70-  
360 150 ms after stimulus onset, was ( $p = 0.010$ , [ $<0.001$  0.052], 99%). Our visual oddball  
361 paradigm thus meets the first criterion of *yielding a robust deviance response*, as a  
362 significant difference in the response to deviant compared to standard light stimuli could  
363 be assessed from VEPs recorded from V1 in freely behaving mice. Compared to the V1  
364 EEG recordings, the oddball paradigm elicited no apparent VEP responses at the  
365 prefrontal electrode, nor a distinguishable difference wave (data not shown), indicating  
366 specificity of the test paradigm to the visual system.

### 367 *3.2 Visual mismatch negativity in the late VEP component is stimulus-independent*

368 To meet the mismatch negativity criterion of stimulus-independency, the difference  
369 between VEP responses to standard and deviant stimuli of intensity increases and  
370 intensity decreases should contain similar components. Visual inspection of the standard  
371 and deviant VEP waveforms (averaged over the responses from V1 left and right, and the  
372 two different recording days) revealed different features in the context of intensity  
373 increase or decrease stimuli, in particular with respect to the early latencies. Specifically,  
374 the VEP in response to an intensity increase, for both standard and deviant stimuli,  
375 contained additional early latency components between 20 and 60 ms that were not  
376 evident in the VEP in response to an intensity decrease (Fig. 3A).

377 While the early components of standard and deviant VEP waveforms for light  
378 increases and decreases differed, when subtracting the standard from the deviant  
379 response for stimuli of the same light change (i.e. increase or decrease), the deviant-  
380 minus-standard difference waves appeared remarkably similar for both light intensity  
381 changes with respect to the late component around 100 ms (Fig. 3B). However, the late  
382 component of the difference wave, at a latency range of ~70-150 ms, was significantly

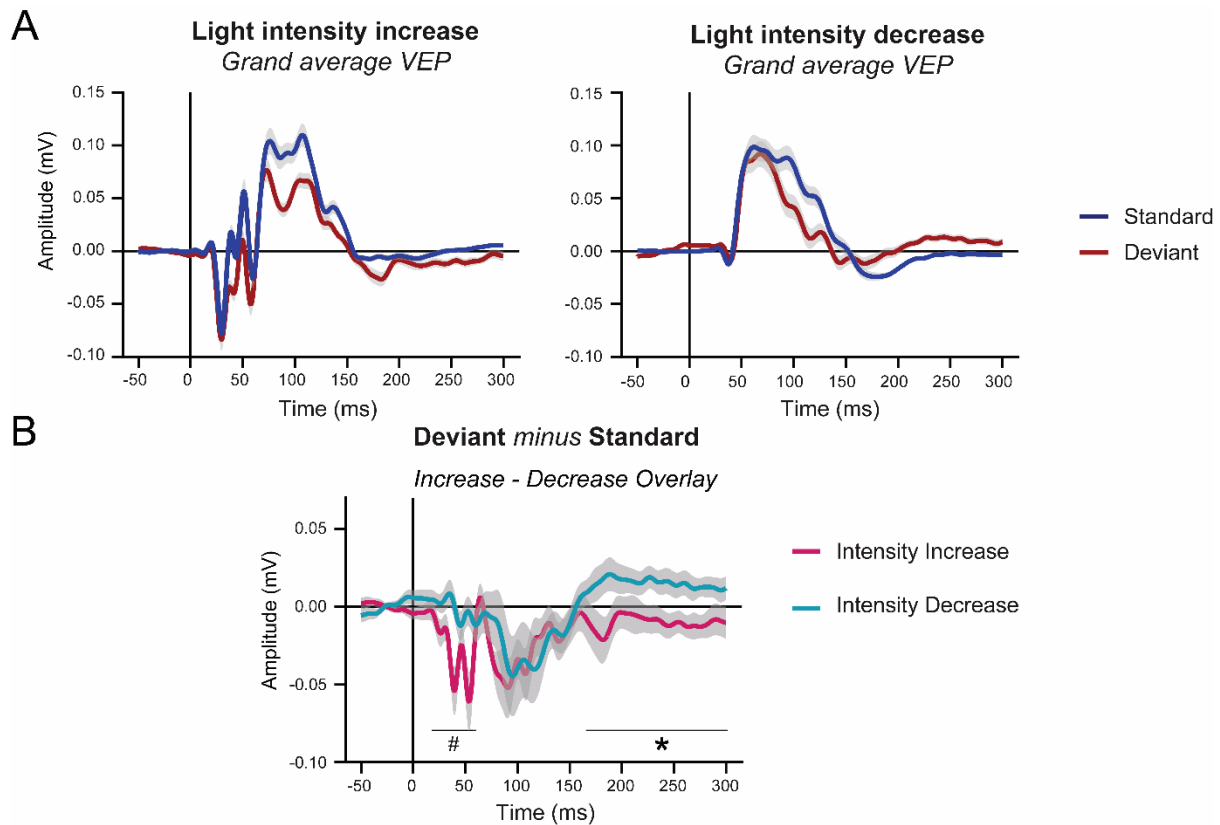

383

384 **Figure 3. Visual mismatch negativity in the visual evoked potential responses to light pulses of**  
385 **increased or decreased intensity. (A)** The VEP waveforms for, respectively, 'intensity increase' (left) and  
386 'intensity decrease' (right) deviants and standards. Data are presented as mean  $\pm$  standard error of the  
387 mean (SEM). **(B)** Overlay of the intensity increase and intensity decrease difference waves. The early  
388 negative wave component between 20-60 ms is present only in the difference wave for intensity increase  
389 deviants and standards, the late negative wave component around 100 ms is present in both difference  
390 waves. A trend level difference between the two difference waves is observed for the early latencies  
391 between 20-60 ms. For latencies between 170-300 ms, the waveforms of the intensity increase and  
392 decrease difference waves are significantly different. Data are presented as mean  $\pm$  95% confidence  
393 intervals. Responses were averaged for right and left V1, as well as the first and second recording. Error  
394 bars represent the variance between animals.  $n = 13$ ,  $*p < 0.01$ ,  $\#p < 0.1$ .

395 different from zero for the intensity increase ( $p = 0.006$ , [ $<0.001$  0.036], 100%), but did  
396 not reach significant for the intensity decrease responses ( $p = 0.065$ , [ $<0.001$  0.242],  
397 42%). The early component of the difference wave was only evident in the difference  
398 wave of an intensity increase ( $p = 0.030$ , [0.004 0.072], 89%); decrease:  $p = 0.603$ , [0.106

399 1.00], 0%). For the difference wave of the intensity decrease responses, the shape of the  
400 early component was visible but did not differ in amplitude from zero ( $p = 0.603$ , [0.106  
401 1.00], 0%). After 150 ms, the difference waves from the intensity increase and decrease  
402 responses showed slow shifts in opposite direction which was most evident beyond the  
403 ~200 ms latency range of the original VEPs (intensity increase:  $p = 0.149$ , [0.010 1.00],  
404 25%; intensity decrease:  $p = 0.016$ , [ $<0.001$  1.00], 65%). When comparing the features of  
405 the light increase and the light decrease difference waves directly, the early component  
406 was found to differ significantly on a  $p < 0.1$  level (~20-60 ms,  $p = 0.09$ , [0.012 1.00], 16%  
407 smaller than 0.05, 57% smaller than 0.1). Despite the fact that the late component was  
408 significantly different from zero for the intensity increase but not the intensity decrease,  
409 no differences between the intensity increase and decrease were found for the late  
410 component ( $p = 0.368$  [0.12 1.00], 0%). In addition, outside the identified window of  
411 deviance detection (~30-150 ms), a significant difference between the intensity increase  
412 and decrease difference waves was found for the additional late component between  
413 ~170-300 ms ( $p = 0.008$  [ $<0.001$  1.00], 83%). In conclusion, although both the early and  
414 the late latency component were more pronounced in light intensity increase difference  
415 waves, the late negative component at ~100 ms could not be statistically differentiated  
416 between the responses to light intensity increases and decreases. With the use of this  
417 component of the deviant-minus-standard difference waves, our vMMN paradigm thus  
418 satisfies our second criterion of *stimulus independency*.

419         The comparison of the intensity increase and decrease responses also revealed,  
420 perhaps not surprisingly, that the 'off-response' to an intensity increase – in essence  
421 being an intensity decrease – showed a VEP similarly shaped as the 'on-response' of the  
422 intensity decrease and vice versa (Supplementary Fig. 1). Increases and decreases in light  
423 intensity thus seemed to be processed as *shifts* in light intensity rather than as flashes of

424 *different* intensities. The on- and off-responses to a light increase showed slightly higher  
425 amplitudes compared to the on- and off-responses to a light decrease. The chosen  
426 magnitude of the intensity shifts, which was larger for increases than decreases (i.e. a  
427 shift from 0.15 to 1.7 compared to 0.15 to 0.02  $\mu\text{W}/\text{cm}^2/\text{mm}$ ), was selected based on tests  
428 with a 1-ms flash VEP paradigm that showed an equal amplitude difference for both  
429 increase and decrease intensities compared to the VEP amplitude response to the ISI  
430 intensity. However, in the deviant paradigm the larger intensity shifts still evoked a  
431 slightly higher amplitude response. As the latencies of all identified deviance detection  
432 components fall within the 300-ms duration of the light stimuli, these off-responses do  
433 not affect our deviance detection.

### 434 *3.3 Visual mismatch negativity shows repeatability in an independent measurement*

435 Our third criterion for a vMMN paradigm concerns repeatability of the outcome in  
436 independent measurements. To assess this, each animal was subjected to the visual  
437 oddball paradigm twice on two separate days. Using cluster-based permutation analysis,  
438 no differences between the first and second recording were observed for either the  
439 standard VEPs, deviant VEPs or difference waves for the combined responses to intensity  
440 increases and decreases (Fig. 4). For both the standard VEP and the difference wave, only  
441 four percent of the clusters found after bootstrapping with random subsets of standards  
442 was smaller than 0.05, of which all but one had a latency of more than 150 ms (difference  
443 wave:  $p = 0.498$  [0.010 0.988], 4.1%; standard:  $p = 0.490$  [0.006 0.938], 4.0%). For the  
444 deviant, two clusters were found ( $p = 0.814/0.608$ ). These outcomes indicate that our  
445 visual oddball paradigm has a good *test-retest reliability* and therefore also meets the  
446 third criterion.

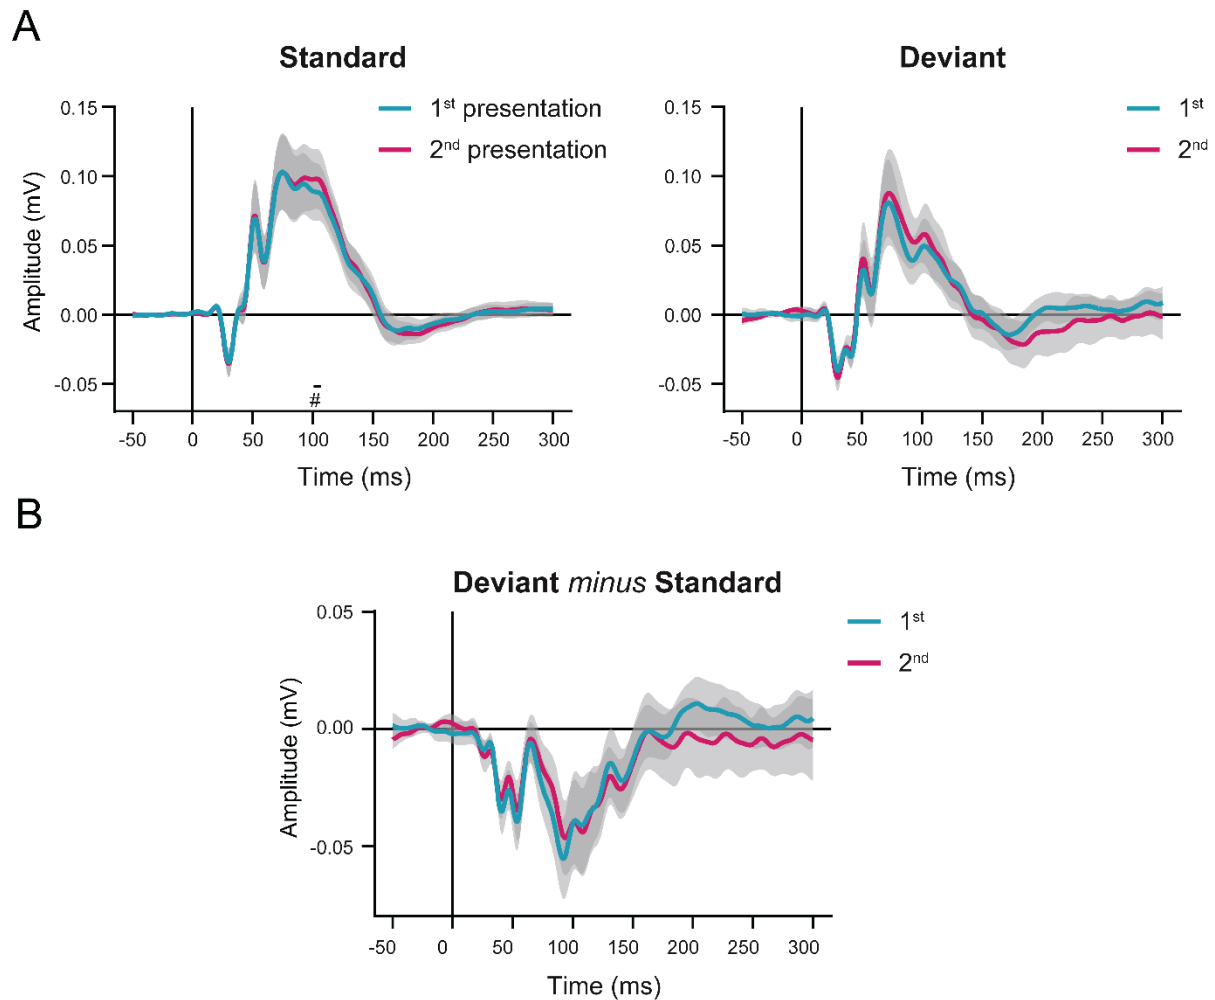

447

448 **Figure 4. Comparison of the visual evoked potential responses from the 2 independent**  
449 **measurements.** The same light intensity oddball paradigm was presented to all mice twice, on separate  
450 days (i.e. 1<sup>st</sup> and 2<sup>nd</sup> presentation). **(A)** VEPs in response to standard and deviant stimuli, averaged for,  
451 respectively, the 1<sup>st</sup> and the 2<sup>nd</sup> presentation. **(B)** Overlay of the deviant minus standard difference waves.  
452  $n = 11$ , data are presented as mean  $\pm$  95% confidence interval. Gray shading represent the variance between  
453 animals. Cluster-based permutation analysis did not reveal any significant differences between the 1<sup>st</sup> and  
454 the 2<sup>nd</sup> presentation.

### 455 *3.4 Mice show intrinsic drive for locomotor activity during visual stimulation*

456 An advantage of using a freely behaving set-up is the opportunity to assess spontaneous  
457 behaviour during the EEG recordings. Mice in our vMMN paradigm turned out to show  
458 relatively constant high locomotor activity levels during recordings. An exception to this

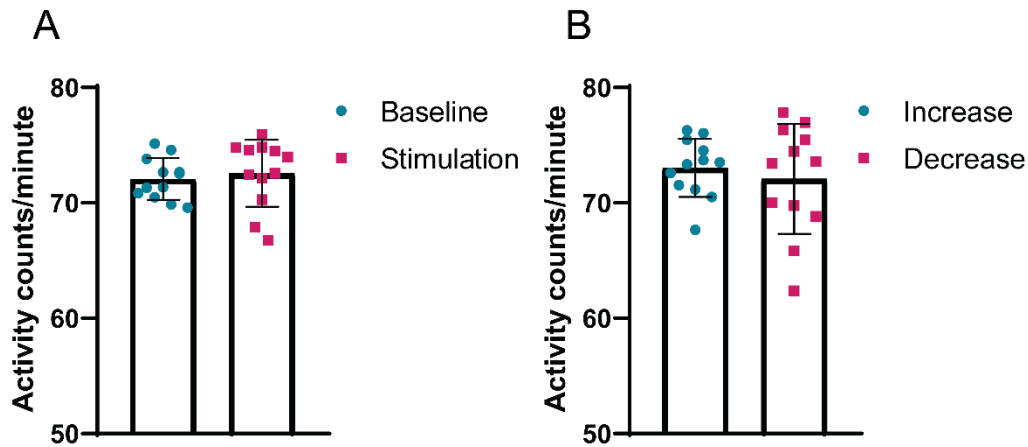

459

460 **Figure 5. Locomotor activity during EEG assessments in the freely behaving visual stimulation set-**  
461 **up.** Non-specific PIR-movement sensors inside the light spheres registered activity-counts. The number of  
462 activity-counts per minute were calculated for all animals for the different phases of the paradigm.  
463 Locomotor activity was compared between the baseline and stimulation periods (A), and between the  
464 stimulation blocks with respectively intensity increase or decreases as standard (B). N = 12, data are  
465 presented as mean  $\pm$  standard deviation with individual data points.

466 were two mice which were asleep during part of the first recording session, the  
467 recordings of which were excluded from further analysis. For the remaining recordings  
468 of all mice, periods of inactivity were rare and the overall average interval between two  
469 locomotor activity events (as registered by PIR movement sensors in the setup) was only  
470  $0.83 \pm 0.02$  seconds. The occurrence of VEPs during periods inactivity was too infrequent  
471 to allow correlating VEP features with expression of locomotor activity. No differences  
472 were found between the activity counts per minute for the baseline ( $72.07 \pm 1.80$ ) and  
473 the stimulation windows ( $72.56 \pm 2.90$ ,  $Z = 0.72$ ,  $p = 0.471$ ), nor between the stimulation  
474 block in which intensity increases served as standards ( $73.03 \pm 2.52$ ) and the block in  
475 which intensity decreases served as standards ( $72.08 \pm 4.76$ ,  $Z = 0.12$ ,  $p = 0.908$ ). Thus,  
476 during the EEG assessments in the light sphere, mice showed a high drive for locomotor  
477 activity, which was not affected by the presentation of visual stimuli.

478 *3.5 Visual deviance detection is also evident from the light-triggered time-frequency*  
479 *response*

480 In addition to examining VEP waveform features from the deviant-standard difference  
481 waves, we analysed the EEG TFR. Human studies showed that vMMN has oscillatory  
482 components that are not phase-locked to the stimulus and would therefore cancel out  
483 when averaging over trials, which is part of classical event-related potential (ERP)  
484 analysis (Stothart and Kazanina, 2013). TFRs are time-locked, but in contrast to ERP  
485 waveforms, not necessarily phase-locked to the stimulus and can therefore give a more  
486 complete picture of stimulus-associated activity. Visual inspection of the frequency  
487 spectra in response to standards and deviants revealed activity in several frequency  
488 ranges. The EEG response to standard stimuli – combined for intensity increases and  
489 decreases – showed an apparent increased power for the beta-lower gamma (~20-40 Hz,  
490 labelled with ‘1’ in Fig. 6A) and the gamma range (~50-100 Hz, labelled with ‘2’ in Fig.  
491 6A) at a latency between ~20 and ~70 ms after stimulus onset. In addition, a broad  
492 increase in power was seen for the theta range (~4-9 Hz, labelled with ‘3’ in Fig. 6A),  
493 evident from stimulus onset to a latency of ~200 ms. While the TFR to deviant stimuli  
494 showed an overall comparable pattern (Fig. 6A), comparison between deviant and  
495 standard TRFs in a deviant minus standard heatmap revealed multiple clusters with  
496 significantly different frequency components (Fig. 6A). Most evident was a cluster  
497 between ~20-120 ms, indicating increased EEG power in the range from ~10-70 Hz in  
498 response to deviants ( $p = 0.022$ , labelled with ‘A’ in Fig. 6A). This cluster seemed to be the  
499 result of a combination of an altered shape of the beta/gamma response (labelled with  
500 ‘1’) to the deviant compared to the standard stimuli, as well as an additional deviant  
501 response in the alpha/beta band (~10-20 Hz, labelled with ‘4’ in Fig. 6A) which was not  
502 evident in the response to the standard. The gamma response (~50-100 Hz) contained

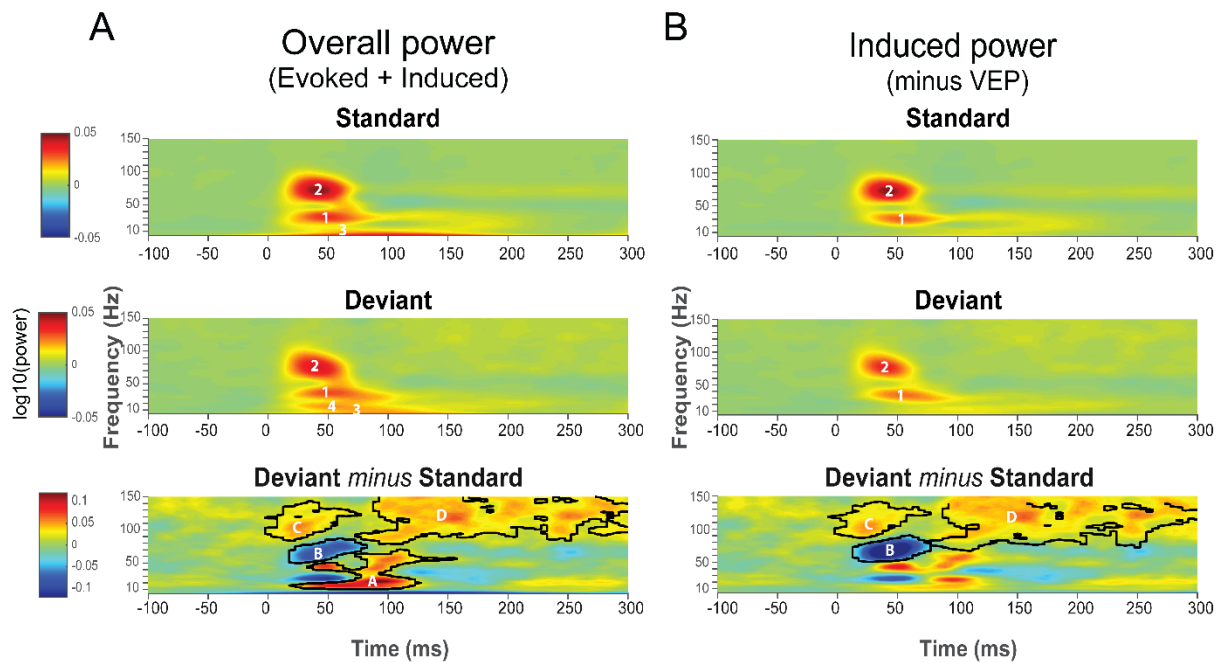

503

504 **Figure 6. Visual mismatch negativity in the time-frequency response.** Panels show clusters of the  
505 power of both overall oscillatory activity (A), as well as induced oscillatory activity (B) in the vMMN  
506 paradigm. To isolate induced oscillatory activity, the averaged waveform was subtracted from each  
507 individual trial before running a time-frequency analysis. From top to bottom panel time-frequency  
508 responses to standard stimuli, deviant stimuli, and a deviant minus standard difference plot are shown.  
509 TFRs were obtained by performing Hanning-window convolution 4-150 Hz with 5 ms time steps. Absolute  
510 baseline-correction was performed using -0.2 - -0.1 ms as the baseline. TFRs to light increases and  
511 decreases, the right and left V1 as well as and second recording were averaged. Y-axis lower cut-off is 4 Hz.  
512 In the difference plot, significant ( $p < 0.05$ ) time-frequency clusters are outlined.  $n = 13$ .

513 less power in response to deviant compared to standard stimuli ( $p = 0.048$ , labelled with  
514 'B' in Fig. 6A). Lastly, increased EEG power in the high gamma range ( $\sim 80$ -150 Hz) was  
515 seen in response to the deviant compared to the standard, both shortly following stimulus  
516 onset between  $\sim 0$ -60 ms ( $p = 0.036$ , labelled with 'C' in Fig. 6A) and in a later window  
517 between  $\sim 90$  and  $\sim 300$  ms ( $p = 0.002$ , labelled with 'D' in Fig. 6A).

518 Oscillatory activity can be divided into evoked power, which is the direct  
519 frequency representation of the VEP waveform response, and induced power, which is  
520 the oscillatory activity that is non-phase-locked to the stimulus and thus not found in the



521 VEP waveforms (Jones, 2016). To assess which oscillatory clusters in our analysis  
522 represented induced power, the time-frequency analysis was also ran after subtracting  
523 the average VEP waveform from every single trial per condition (Park et al., 2018).  
524 Clusters 3 and 4 in the TFR and cluster A in the difference plot were not present when  
525 using this analysis (Fig. 6B) and thus represent evoked power. On the other hand, clusters  
526 1 and 2 in the TFR and clusters B, C and D in the difference plot were still present after  
527 running time-frequency analysis on mean-subtracted data and represent the power of  
528 induced oscillatory activity. With our visual oddball paradigm in freely behaving mice,  
529 deviance detection was thus not only reflected in the VEP waveforms, but also in evoked  
530 as well as induced power in the EEG time-frequency responses.

### 531 *3.6 Higher numbers of standards preceding a deviant strengthen visual mismatch negativity*

532 In light of the ongoing debate about the role of adaptation to the repeatedly presented  
533 standards in deviance detection paradigms (Garrido et al., 2009; Grimm et al., 2016), we  
534 assessed whether stimulus history influenced our VEP-based vMMN. Using linear Mixed  
535 effects models (Bates et al., 2015b; Gelman and Hill, 2007) we explored whether the  
536 vMMN amplitude (VEP- and TFR-based) changed with varying numbers of standards  
537 preceding the deviant. In addition, we assessed whether this was potentially also affected  
538 by the stimulus types, i.e., an intensity increase or decrease. The mean amplitude and  
539 oscillatory power of standard and deviant VEPs and TFRs were extracted from each trial,  
540 for both the cluster-based defined early (40-60 ms) and late (70-150 ms) latency  
541 windows rounded to the nearest ten, and the identified gamma (B, ~50-100 Hz) and high  
542 gamma (C and D, ~80-150 Hz) induced frequency clusters. We subsequently analysed the  
543 amplitude or power using a linear mixed model with the factors 'oddball' (standard,

544

A

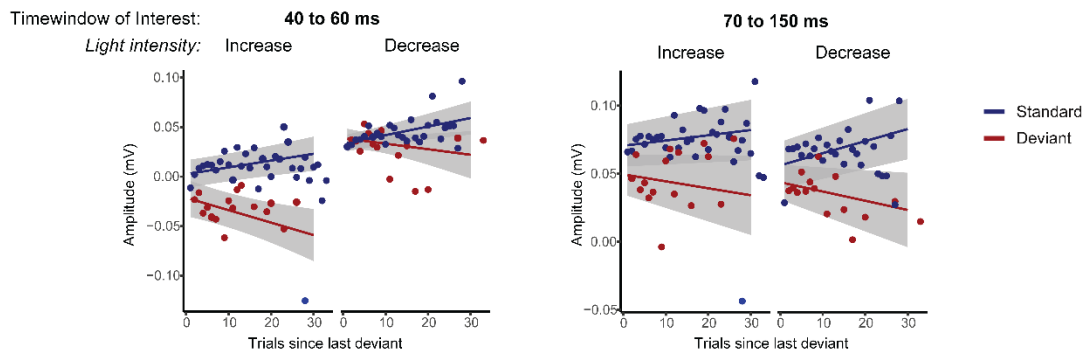

B

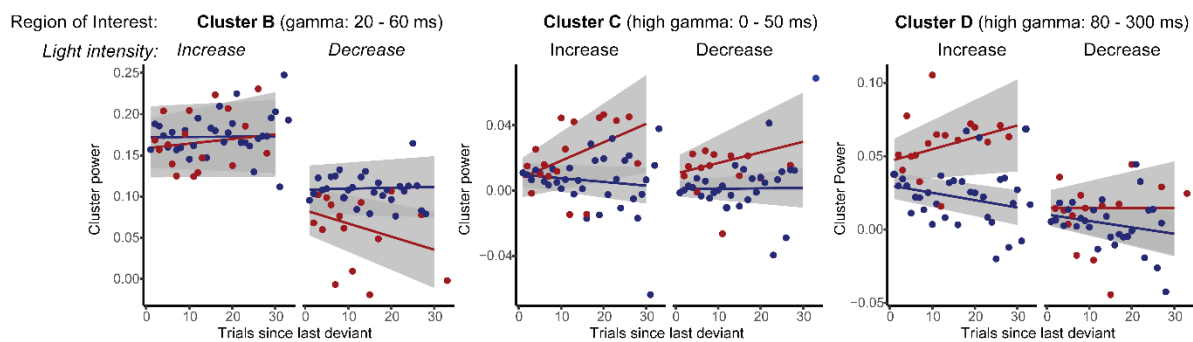

545

546 **Figure 7. Exploration of effects of stimulus history on VEP- and TFR-based mismatch negativity**

547 **features.** Analyses were performed for the earlier found VEP (A, separated for the early and late negativity)

548 and TFR (B) components. Each of the different graphs depicts the mean amplitude (for VEP features) or

549 power (for TFR features) as a function of the number of preceding standards since the occurrence of the

550 last deviant. For both VEP and TFR features, the vMMN amplitude (for VEP) or power (for TFR) is the

551 difference between the standard and deviant amplitude, which for the early and late VEP component and

552 TFR cluster B was found to increase with an increasing number of preceding standards. Data are presented

553 separately for standard and deviant stimuli, as well as for intensity increases and decreases. n = 13, data

554 are presented as mean  $\pm$  95% confidence interval.

555 deviant), 'stimulus' (light increase, decrease), and 'number of trials since last deviant' (1-

556 30; continuous and linear variable).

557 *Early negativity (40-60 ms):* amplitudes of the vMMN (deviant minus standard) in

558 the early latency increased with the number of trials since the last deviant ( $1.684 \cdot 10^{-3}$

559 mV (SE:  $0.338 \times 10^{-3}$ ) per trial). In other words we observed an increase in the early  
560 latency vMMN amplitude with longer stretches of standard trials (oddball  $\times$  # of trials  
561 since last deviance:  $t(25956) = 4.98, p < 0.001$ , Fig. 7A). The amplitude in response to  
562 standard VEPs increased with number of trials since last deviant ( $0.775 \times 10^{-3}$  mV (SE:  
563  $0.176 \times 10^{-3}$ ) per trial;  $t(14.9) = 4.41, p < 0.001$ ) and the amplitude in response to deviant  
564 VEPs decreased ( $-0.909 \times 10^{-3}$  mV (SE:  $0.342 \times 10^{-3}$ ) per trial;  $t(211.9) = -2.66; p = 0.008$ ).  
565 Furthermore, we confirmed our earlier observation that the amplitudes in the early  
566 latency window, irrespective of stimulus history, were stimulus specific (oddball  $\times$   
567 stimulus type:  $t(25956) = 4.72, p < 0.001$ ; light increase: deviant minus standard:  $-0.0368$   
568 mV, SE =  $4.35 \times 10^{-3}$ ;  $t(20.6) = 8.46, p < 0.001$ ; light decrease: deviant minus standard:  $-$   
569  $0.0039$  mV, SE =  $4.35 \times 10^{-3}$ ;  $t(20.7) = 0.898, p > 0.380$ ).

570 *Late negativity (70-150 ms):* amplitudes of the vMMN in the late latency window  
571 paralleled the observations for the early component with respect to a modulation of the  
572 vMMN by stimulus history (oddball  $\times$  trials since last deviant:  $1.232$  mV (SE:  $0.390 \times 10^{-3}$   
573  $^3$ ); per trial;  $t(25944) = -3.16, p = 0.002$ ). While the amplitude of the late negativity  
574 response to standard VEPs increased with decreasing novelty ( $6.370 \times 10^{-3}$  mV (SE:  
575  $0.180 \times 10^{-3}$ ) per trial;  $t(14.9) = 3.53, p = 0.003$ ), for the deviant responses, the late  
576 negativity amplitude did not show a significant decrease in amplitude ( $0.060 \times 10^{-3}$  mV  
577 (SE:  $0.383 \times 10^{-3}$ );  $t(284.3) = 1.55, p > 0.122$ ), contrary to what was observed for the early  
578 negativity. In the late latency window no overall effect of stimulus type on deviant  
579 processing was observed (oddball  $\times$  stimulus type:  $t(25944) = -1.19, p = 0.235$ ). To  
580 further address the stimulus independency, it was tested whether the effects of stimulus  
581 history on the late component differed between the stimulus types (i.e. light increase vs  
582 light decrease). Addition of this interaction to the model did not improve the fit of the  
583 model ( $\Delta AIC = +5.4$ ;  $\Delta BIC = +28$ , a smaller AIC indicating improvement of the model

584 weighting complexity [number of parameters] and explained variance), supporting the  
585 claim that the amplitudes in the late component were indeed stimulus non-specific.

586 *Oscillatory clusters:* for the TFR-based analysis only the early high gamma cluster  
587 (C, 80-150 Hz) showed a significant relationship between stimulus history and deviance  
588 detection (C: oddball  $\times$  trials since last deviant  $t(25977) = 2.05, p = 0.041$ ; D: oddball  $\times$   
589 trials since last deviant:  $t(25959) = 1.72, p = 0.086$ , Fig. 7B). However, the large variation  
590 and p-values close to the significance threshold suggest that these analyses were  
591 underpowered and therefore should be interpreted carefully.

592

#### 593 **4. Discussion**

594 Mismatch negativity is an important function of the brain to identify environmental  
595 changes that may require subsequent appropriate behavioural and/or physiological  
596 responses. The goal of this study was to develop and validate a method for assessing  
597 vMMN in freely behaving mice. The developed paradigm met all three pre-defined  
598 criteria: *a robust deviance response, stimulus-independence, and repeatability*. *First*, the  
599 light intensity-based oddball paradigm evoked a bi-phasic negativity in the VEP  
600 difference wave, of which the late 70-150 ms component was significantly different from  
601 zero, indicating that the paradigm was able to assess the ability of mice to differentiate  
602 between standard and deviant flashing light stimuli. *Second*, vMMN in this late component  
603 was found to be independent of the type of stimulus (i.e., light increase or decrease) that  
604 was used a deviant. *Third*, the paradigm showed good repeatability in a second recording  
605 performed on a separate day.

606           The vMMN presented with our paradigm matches well with previously reported  
607 vMMN features from both human and rodent EEG. The only other EEG-based vMMN study  
608 in mice, in which a pattern-based oddball paradigm was used in head-fixed animals, also  
609 showed bi-phasic responses (Hamm and Yuste, 2016). They identified the differences in  
610 response to standard and deviant stimuli in early latencies to reflect stimulus-specific  
611 adaptation, while differences in later latencies reflected deviance detection activity. Also  
612 human visual ERP studies indicated that early components of sensory processing  
613 represented adaptation effects, while later components were specifically associated with  
614 violations of expectation (Czigler et al., 2006; File et al., 2017). The onset and timing of  
615 the early and late phases differed for each of the studies, as well as the present study, both  
616 between and within species. Besides differences in neuronal pathways between species,  
617 deviance detection latencies may also be influenced by the stimulus complexity  
618 (Kojouharova et al., 2019). For example, Hamm and Yuste (2016), which used visual  
619 pattern stimuli instead of the light flashes used in our study, found longer latencies  
620 (between ~ 40 and 240 ms) in their mouse visual deviance detection features compared  
621 to the latencies observed in our paradigm. In our freely-moving deviance detection  
622 paradigm, we could not assess the contribution of stimulus-specific adaptation, as the  
623 ‘many standards control paradigm’ (Czigler et al., 2006; Hamm and Yuste, 2016; Harms  
624 et al., 2016; File et al., 2017) was not used. We were however able to show that the early  
625 component was sensitive to stimulus properties (i.e. a significant deviance detection  
626 effect was only present for light intensity increases), while the late component was  
627 stimulus-type-independent. Additionally, the effect of stimulus history on vMMN  
628 amplitude was larger for the early compared to the late component. The finding of larger  
629 effects of stimulus history and stimulus-specificity on the early component are in line  
630 with the previously reported stimulus-specific adaptation in the early latencies and

631 deviance detection in the later latencies (Czigler et al., 2006; File et al., 2017; Hamm and  
632 Yuste, 2016). We therefore speculate that also in our paradigm the early component is  
633 primarily driven by stimulus-specific adaptation, while the late component represents  
634 active deviance detection. Taken together, our vMMN matches well with that observed in  
635 humans as well as in mice. Our data show that head fixation is not required for measuring  
636 vMMN in mice, and that the implemented paradigm and observed responses in mice have  
637 translational value.

638         Performing sensory processing assessments in freely behaving animals does not  
639 only reduce stress effects but also increases behavioural relevance and can potentially  
640 provide more insight via inclusion of behavioural data. In the current study, locomotor  
641 activity levels of the experimental animals were recorded during the VEP assessments.  
642 This revealed that during the experiments in the light sphere, mice show a high intrinsic  
643 drive for locomotor activity as they showed high levels of activity during the entire  
644 recording session. Locomotor activity levels were not altered by the presentation of  
645 visual stimuli. Since inactive periods were rare, we could not perform separate analysis  
646 of VEPs and related deviant features during active and inactive periods. It has previously  
647 been shown that locomotor activity affects EEG in rodents (Hansen et al., 2019), however  
648 it is unlikely that locomotion contributed to the difference we found between the shape  
649 of increase and decrease VEPs since the amount of locomotor activity was equal between  
650 both light increase and decrease stimulation blocks. Increasing habituation periods in the  
651 set-up, or increasing the duration of the vMMN paradigm might allow for a comparison  
652 between VEP and deviant features during active and inactive periods in future  
653 experiments. While assessing visual evoked brain activity during full-field visual  
654 stimulation is in our view a logic first step, a future goal would be to develop more

655 naturalistic set-ups where ecologically relevant visual input is presented in such a way  
656 that the perception of such input is dependent on the animal's behaviour.

657 VEPs in response to intensity increases and decreases showed different features  
658 in particular for the early components. Rather than being processed as flashes of different  
659 intensities, based on the off-responses, the used stimuli seemed to be processed as shifts  
660 in light intensity. While the processing of different levels of light intensity (Lopez et al.,  
661 2002; Perenboom et al., 2020) and its dependence on light-adaptation (Suzuki et al.,  
662 1972) have been studied in mice and cats, little is known on how shifts in light intensity  
663 are processed. One early study described the presence of off-responses, which were,  
664 contrary to what we observed, of similar shape as on-responses, when light flashes (i.e.  
665 increases in light intensity) lasted more than 100 ms (Crescitelli and Gardner, 1961).

666 Exploratory analysis of the effect of stimulus history showed that an increased  
667 number of trials since the last deviant, in other words a longer stretch of preceding  
668 standard presentations, increased the amplitude of the vMMN. This was the result of an  
669 increased amplitude of standard VEP responses and a decreased amplitude of deviant  
670 VEP responses with a higher number of preceding standards. These changes seem to  
671 suggest that our VEP-based deviance detection paradigm was sensitive to short-term  
672 novelty of the deviant; as it showed larger responses when the previous deviant was  
673 presented a longer time ago. The observed positive relationship between vMMN  
674 amplitude and number of preceding standards could be a result of stimulus-specific  
675 adaptation of the standard, in our paradigm leading to increased amplitudes after more  
676 repetitions. It was slightly unexpected that adaptation to the standard after stimulus  
677 repetition presented as an increase in amplitude, instead of depression of the responses.  
678 This could be interpreted as a sensitization or tuning of the visual cortices to a specific

679 stimulus as shown by others (Clapp et al., 2006; Solomon and Kohn, 2014). While  
680 depression-dominated adaptation to visual stimuli has been shown in anaesthetized  
681 animals (Keller and Martin, 2015; Sanchez-Vives et al., 2000), a recent study showed that  
682 in awake mice certain types of cortical interneurons show depression-dominated while  
683 others show sensitization-dominated adaptation, the strength of which changed with  
684 locomotion. As a result, the pyramidal responses could be sensitized as well as depressed  
685 (Heintz et al., 2020). Alternatively, larger deviance detection after more preceding  
686 standards could result from the brain's response to the violation of a stronger memory-  
687 based expectation of the standard (Garrido et al., 2009). Although counterintuitive,  
688 violation-alerting activity in our data would actually be represented by the observed  
689 reduction in deviant amplitude, resulting in an increased difference with a standard.  
690 Further studies are needed to determine which of these two processes primarily drives  
691 the deviance detection features in our paradigm. Larger differences in responses to  
692 standard and deviant visual pattern stimuli with more preceding standards have  
693 previously also been shown in rats, although this difference was dominantly driven by  
694 alterations in the responses to the deviant stimuli, without a change in responses to the  
695 standard (Vinken et al., 2017). Also in human auditory MMN paradigms the amplitude of  
696 the MMN increases when the overall probability of deviants is decreased from 30% to  
697 10% or from 13% to 1.5% (Sato et al., 2000; Sabri and Campbell, 2001), as well as with a  
698 higher number of standards preceding a deviant within a paradigm with a stable overall  
699 deviant probability of 20% (Matuoka et al., 2006). Together, these findings suggest that  
700 the effect size of our vMMN paradigm could be further increased by having a higher  
701 minimum number of standards between deviants than the two currently used in our  
702 experiments.



703 In addition to the VEP waveforms, visual deviance detection was also found to be  
704 represented in both evoked and induced oscillatory activity. Human visual and mouse  
705 auditory studies have previously shown oscillatory responses related to deviance  
706 detection, but the paradigms and corresponding responses showed large variability  
707 (Stothart and Kazanina, 2013; Ahnaou et al., 2017; Hesse et al., 2017; Yan et al., 2017).  
708 Differences across paradigms and species, as well as the fact that some of these studies  
709 use auditory while others use visual stimuli, make a direct comparison of findings from  
710 the studies assessing frequency response in deviance detection paradigms difficult.

711 In the TFR the higher gamma clusters between 50-150 Hz represented induced  
712 (i.e. non-phase-locked) oscillatory activity. This is in line with the fact that induced power,  
713 thought to represent top-down connections, concerns higher frequencies over longer  
714 latencies, while evoked power of the visual evoked responses, thought to represent  
715 bottom-up connections, concerns lower frequencies over shorter latencies (Chen et al.,  
716 2012). The broad increase in high gamma power (80-150 Hz) showed a tendency to be  
717 enhanced with more preceding standards, although this effect was not statistically  
718 significant. Although the role of the various frequency bands in specific functional  
719 processes is not well understood, gamma frequency cortical activity has generally been  
720 linked to increased spiking activity and network excitation (Yizhar et al., 2011; Cho et al.,  
721 2015; Vogt et al., 2015). In the visual cortex of freely behaving mice, 30-100 Hz broadband  
722 gamma activity was found to functionally discriminate between segregated cortical  
723 layers of visual processing (Senzai et al., 2019). It was shown that gamma activity can be  
724 subdivided into functionally distinct broad- (30-90 Hz) and narrowband (60 Hz) gamma  
725 oscillations, which show complementary responses to changes in visual contrast (Saleem  
726 et al., 2017). While narrowband gamma has been associated with thalamocortical  
727 communication, broadband gamma power is thought to represent corticocortical

728 communication. Our recordings did not allow to distinguish between underlying network  
729 mechanisms, but the broad increase in high gamma band activity we observed in the TFR  
730 deviant minus standard difference plots could reflect increased corticocortical network  
731 activity during deviance processing. This could suggest involvement of the prefrontal  
732 cortex, in line with what was found in human vMMN studies (Yucel et al., 2007; Kimura  
733 et al., 2010; Kimura et al., 2011), although no robust visual evoked responses were  
734 recorded from our prefrontal cortex electrode. The presence of induced broadband  
735 gamma responses thus seems to suggest communication between the visual cortex and  
736 other cortical, possibly frontal, areas during visual deviance detection. However, the  
737 functional significance of EEG activity in certain frequency bands remains to be assessed,  
738 thus interpretations related to these specific frequency bands should be drawn carefully.

739 In conclusion, we developed the first, robust and repeatable vMMN paradigm  
740 based on changes in light intensity in freely behaving mice. Our paradigm provides a  
741 functional outcome measure for visual processing in these mice. Because no head fixation  
742 is needed, our paradigm minimizes animal discomfort while increasing behavioural  
743 relevance. The paradigm can easily be implemented to assess sensory processing deficits  
744 in mouse models of brain disease, and has the possibility to be compared with  
745 experiments in humans which increases translatability of preclinical outcomes.

746

## 747 **Acknowledgements**

748 This work was supported by a ZonMW TOP [grant number 91216021, 2017, awarded to  
749 HB and MJK] and the national Medical NeuroDelta [awarded to AvdM].

## 750 **Declaration of interest**

751 None

752 **Author contribution statement**

753 **Renate Kat:** Conceptualization, methodology, investigation, formal analysis,  
754 visualization, writing – original draft **Berry van der Berg:** Formal analysis, visualization,  
755 writing – reviewing & editing **Matthijs JL Perenboom:** Methodology, software **Maarten**  
756 **Schenke:** Investigation **Arn MJM van den Maagdenberg:** Resources, funding  
757 acquisition, writing – review & editing **Hilgo Bruining:** Funding acquisition, writing –  
758 review & editing **Else A Tolner:** Conceptualization, writing – reviewing & editing,  
759 supervision **Martien JH Kas:** Conceptualization, funding acquisition, writing – reviewing  
760 & editing, supervision

761

762 **References**

763 Ahnaou, A., Moechars, D., Raeymaekers, L., Biermans, R., Manyakov, N. V., Bottelbergs, A.,  
764 Wintmolders, C., Van Kolen, K., Van De Casteele, T., Kemp, J.A., Drinkenburg, W.H.,  
765 2017. Emergence of early alterations in network oscillations and functional  
766 connectivity in a tau seeding mouse model of Alzheimer’s disease pathology. *Sci.*  
767 *Rep.* 7, 1–14. <https://doi.org/10.1038/s41598-017-13839-6>

768 Baker, M., 2013. Neuroscience: Through the eyes of a mouse. *Nature* 502, 156–158.  
769 <https://doi.org/10.1038/502156a>

770 Bates, D., Kliegl, R., Vasishth, S., Baayen, H., 2015a. Parsimonious Mixed Models. ArXiv e-  
771 print 1506.04967v2.

772 Bates, D., Maechler, M., Bolker, B., Walker, S., 2015b. Package lme4. *J. Stat. Softw.* 67, 1–  
773 91. <https://doi.org/http://lme4.r-forge.r-project.org>

- 774 Carrillo-Reid, L., Han, S., Yang, W., Akrouh, A., Yuste, R., 2019. Controlling Visually  
775 Guided Behavior by Holographic Recalling of Cortical Ensembles. *Cell* 178, 447-  
776 457.e5. <https://doi.org/10.1016/j.cell.2019.05.045>
- 777 Chen, C.C., Kiebel, S.J., Kilner, J.M., Ward, N.S., Stephan, K.E., Wang, W.J., Friston, K.J.,  
778 2012. A dynamic causal model for evoked and induced responses. *Neuroimage* 59,  
779 340–348. <https://doi.org/10.1016/j.neuroimage.2011.07.066>
- 780 Cho, K.K.A., Hoch, R., Lee, A.T., Patel, T., Rubenstein, J.L.R., Sohal, V.S., 2015. Gamma  
781 rhythms link prefrontal interneuron dysfunction with cognitive inflexibility in  
782 *dlx5/6+/-* mice. *Neuron* 85, 1332–1343.  
783 <https://doi.org/10.1016/j.neuron.2015.02.019>
- 784 Clapp, W.C., Eckert, M.J., Teyler, T.J., Abraham, W.C., 2006. Rapid visual stimulation  
785 induces N-methyl-D-aspartate receptor-dependent sensory long-term potentiation  
786 in the rat cortex. *Neuroreport* 17, 511–515.  
787 <https://doi.org/10.1097/01.wnr.0000209004.63352.10>
- 788 Cohen, M.X., 2014. Analyzing neural time series data: theory and practice, 1st ed. The  
789 MIT press, Cambridge, Massachusetts.
- 790 Crescitelli, F., Gardner, E., 1961. Correspondences in the behavior of the  
791 electroretinogram and of the potentials evoked at the visual cortex. *J. Gen. Physiol.*  
792 44, 911–928. <https://doi.org/10.1085/jgp.44.5.911>
- 793 Czigler, I., 2007. Visual mismatch negativity: Violation of nonattended environmental  
794 regularities. *J. Psychophysiol.* 21, 224–230. [https://doi.org/10.1027/0269-](https://doi.org/10.1027/0269-8803.21.34.224)  
795 8803.21.34.224
- 796 Czigler, I., Weisz, J., Winkler, I., 2006. ERPs and deviance detection: Visual mismatch

- 797           negativity to repeated visual stimuli. *Neurosci. Lett.* 401, 178–182.
- 798           <https://doi.org/10.1016/j.neulet.2006.03.018>
- 799   File, D., File, B., Bodnár, F., Sulykos, I., Kecskés-Kovács, K., Czigler, I., 2017. Visual
- 800           mismatch negativity (vMMN) for low- and high-level deviances: A control study.
- 801           *Attention, Perception, Psychophys.* 79, 2153–2170.
- 802           <https://doi.org/10.3758/s13414-017-1373-y>
- 803   Fournier, J., Saleem, A.B., Diamanti, E.M., Wells, M.J., Harris, K.D., Carandini, M., 2020.
- 804           Mouse Visual Cortex Is Modulated by Distance Traveled and by Theta Oscillations.
- 805           *Curr. Biol.* 30, 3811-3817.e6. <https://doi.org/10.1016/j.cub.2020.07.006>
- 806   Garrido, M.I., Kilner, J.M., Stephan, K.E., Friston, K.J., 2009. The mismatch negativity: A
- 807           review of underlying mechanisms. *Clin. Neurophysiol.* 120, 453–463.
- 808           <https://doi.org/10.1016/j.clinph.2008.11.029>
- 809   Gelman, a, Hill, J., 2007. Data analysis using regression and multilevel/hierarchical
- 810           models. *Policy Anal.* 1–651. <https://doi.org/10.2277/0521867061>
- 811   Grimm, S., Escera, C., Nelken, I., 2016. Early indices of deviance detection in humans and
- 812           animal models. *Biol. Psychol.* 116, 23–27.
- 813           <https://doi.org/10.1016/j.biopsycho.2015.11.017>
- 814   Hamm, J.P., Shymkiv, Y., Mukai, J., Gogos, J.A., Yuste, R., 2020. Aberrant Cortical
- 815           Ensembles and Schizophrenia-like Sensory Phenotypes in *Setd1a*<sup>+/-</sup> Mice. *Biol.*
- 816           *Psychiatry* 88, 215–223. <https://doi.org/10.1016/j.biopsych.2020.01.004>
- 817   Hamm, J.P., Yuste, R., 2016. Somatostatin Interneurons Control a Key Component of
- 818           Mismatch Negativity in Mouse Visual Cortex. *Cell Rep.* 16, 597–604.
- 819           <https://doi.org/10.1016/j.celrep.2016.06.037>

- 820 Hansen, I.H., Agerskov, C., Arvastson, L., Bastlund, J.F., Sørensen, H.B.D., Herrik, K.F.,  
821 2019. Pharmacoelectroencephalographic responses in the rat differ between  
822 active and inactive locomotor states. *Eur. J. Neurosci.* 50, 1948–1971.  
823 <https://doi.org/10.1111/ejn.14373>
- 824 Harms, L., Michie, P.T., Näätänen, R., 2016. Criteria for determining whether mismatch  
825 responses exist in animal models: Focus on rodents. *Biol. Psychol.* 116, 28–35.  
826 <https://doi.org/10.1016/j.biopsycho.2015.07.006>
- 827 Heintz, T., Hinojosa, A., Lagnado, L., 2020. Opposing forms of adaptation in mouse visual  
828 cortex are controlled by distinct inhibitory microcircuits and gated by locomotion.  
829 *BioRxiv*. <https://doi.org/10.1101/2020.01.16.909788>
- 830 Hesse, P.N., Schmitt, C., Klingenhoefer, S., Bremmer, F., 2017. Preattentive processing of  
831 numerical visual information. *Front. Hum. Neurosci.* 11, 1–14.  
832 <https://doi.org/10.3389/fnhum.2017.00070>
- 833 Hubel, D., Wiesel, T., 1968. Receptive Fields and Functional Architecture of Monkey  
834 Striate Cortex. *J. Physiol.* 195, 215–243.  
835 <https://doi.org/10.1113/jphysiol.1968.sp008455>
- 836 Hubel, D.H., 1959. Single unit activity in striate cortex of unrestrained cats. *J. Physiol.*  
837 147, 226–238. <https://doi.org/10.1113/jphysiol.1959.sp006238>
- 838 Jones, S.R., 2016. When brain rhythms aren't 'rhythmic': implication for their  
839 mechanisms and meaning. *Curr. Opin. Neurobiol.* 40, 72–80.  
840 <https://doi.org/10.1016/j.conb.2016.06.010>
- 841 Keller, A.J., Martin, K.A.C., 2015. Local circuits for contrast normalization and adaptation  
842 investigated with two-photon imaging in cat primary visual cortex. *J. Neurosci.* 35,

- 843 10078–10087. <https://doi.org/10.1523/JNEUROSCI.0906-15.2015>
- 844 Kimura, M., 2012. Visual mismatch negativity and unintentional temporal-context-based  
845 prediction in vision. *Int. J. Psychophysiol.* 83, 144–155.  
846 <https://doi.org/10.1016/j.ijpsycho.2011.11.010>
- 847 Kimura, M., Kondo, H., Ohira, H., Schröger, E., 2011. Unintentional temporal context-  
848 based prediction of emotional faces: An electrophysiological study. *Cereb. Cortex*  
849 22, 1774–1785. <https://doi.org/10.1093/cercor/bhr244>
- 850 Kimura, M., Ohira, H., Schröger, E., 2010a. Localizing sensory and cognitive systems for  
851 pre-attentive visual deviance detection: An sLORETA analysis of the data of Kimura  
852 et al. (2009). *Neurosci. Lett.* 485, 198–203.  
853 <https://doi.org/10.1016/j.neulet.2010.09.011>
- 854 Kimura, M., Widmann, A., Schröger, E., 2010b. Human visual system automatically  
855 represents large-scale sequential regularities. *Brain Res.* 1317, 165–179.  
856 <https://doi.org/10.1016/j.brainres.2009.12.076>
- 857 Kojouharova, P., File, D., Sulykos, I., Czigler, I., 2019. Visual mismatch negativity and  
858 stimulus-specific adaptation: the role of stimulus complexity. *Exp. Brain Res.* 237,  
859 1179–1194. <https://doi.org/10.1007/s00221-019-05494-2>
- 860 Kuznetsova, A., Brockhoff, P.B., Christensen, R.H.B., 2017. lmerTest Package: Tests in  
861 Linear Mixed Effects Models. *J. Stat. Softw.* 82, 1–26.  
862 <https://doi.org/10.18637/jss.v082.i13>
- 863 Lopez, L., Brusa, A., Fadda, A., Loizzo, S., Martinangeli, A., Sannita, W.G., Loizzo, A., 2002.  
864 Modulation of flash stimulation intensity and frequency: Effects on visual evoked  
865 potentials and oscillatory potentials recorded in awake, freely moving mice. *Behav.*

- 866 Brain Res. 131, 105–114. [https://doi.org/10.1016/S0166-4328\(01\)00351-5](https://doi.org/10.1016/S0166-4328(01)00351-5)
- 867 Luke, S.G., 2017. Evaluating significance in linear mixed-effects models in R. *Behav. Res.*  
868 *Methods* 1494–1502. <https://doi.org/10.3758/s13428-016-0809-y>
- 869 Maris, E., Oostenveld, R., 2007. Nonparametric statistical testing of EEG- and MEG-data.  
870 *J. Neurosci. Methods* 164, 177–190.  
871 <https://doi.org/10.1016/j.jneumeth.2007.03.024>
- 872 Matuoka, T., Yabe, H., Shinozaki, N., Sato, Y., Hiruma, T., Ren, A., Hara, E., Kaneko, S.,  
873 2006. The Development of Memory Trace Depending on the Number of the  
874 Standard Stimuli. *Clin. EEG Neurosci.* 37, 223–229.  
875 <https://doi.org/10.1177/155005940603700312>
- 876 Matuschek, H., Kliegl, R., Vasishth, S., Baayen, H., Bates, D., 2017. Balancing Type I error  
877 and power in linear mixed models. *J. Mem. Lang.* 94, 305–315.  
878 <https://doi.org/10.1016/j.jml.2017.01.001>
- 879 May, P., Tiitinen, H., Ilmoniemi, R.J., Nyman, G., Taylor, J.G., Näätänen, R., 1999.  
880 Frequency change detection in human auditory cortex. *J. Comput. Neurosci.* 6, 99–  
881 120. <https://doi.org/10.1023/A:1008896417606>
- 882 Montijn, J.S., Olcese, U., Pennartz, C.M.A., 2016. Visual stimulus detection correlates with  
883 the consistency of temporal sequences within stereotyped events of V1 neuronal  
884 population activity. *J. Neurosci.* 36, 8624–8640.  
885 <https://doi.org/10.1523/JNEUROSCI.0853-16.2016>
- 886 Näätänen, R., Sussman, E.S., Salisbury, D., Shafer, V.L., 2014. Mismatch negativity (MMN)  
887 as an index of cognitive dysfunction. *Brain Topogr.* 27, 451–466.  
888 <https://doi.org/10.1007/s10548-014-0374-6>



- 889 Oostenveld, R., Fries, P., Maris, E., Schoffelen, J.M., 2011. FieldTrip: Open source software  
890 for advanced analysis of MEG, EEG, and invasive electrophysiological data. *Comput.*  
891 *Intell. Neurosci.* 2011. <https://doi.org/10.1155/2011/156869>
- 892 Park, J., van den Berg, B., Chiang, C., Woldorff, M.G., Brannon, E.M., 2018. Developmental  
893 trajectory of neural specialization for letter and number visual processing. *Dev. Sci.*  
894 21, 1–14. <https://doi.org/10.1111/desc.12578>
- 895 Pazo-Alvarez, P., Cadaveira, F., Amenedo, E., 2003. MMN in the visual modality: A  
896 review. *Biol. Psychol.* 63, 199–236. [https://doi.org/10.1016/S0301-](https://doi.org/10.1016/S0301-0511(03)00049-8)  
897 [0511\(03\)00049-8](https://doi.org/10.1016/S0301-0511(03)00049-8)
- 898 Perenboom, T., Schenke, M., Ferrari, M., Terwindt, G., van den Maagdenberg, A., Tolner,  
899 E., 2020. Responsivity to light in familial hemiplegic migraine type 1 mutant mice  
900 reveals frequency-dependent enhancement of visual network excitability. *Eur. J.*  
901 *Neurosci.* 53, 1672–1686. <https://doi.org/10.1111/ejn.15041>
- 902 Sabri, M., Campbell, K.B., 2001. Effects of sequential and temporal probability of deviant  
903 occurrence on mismatch negativity. *Cogn. Brain Res.* 12, 171–180.  
904 [https://doi.org/10.1016/S0926-6410\(01\)00026-X](https://doi.org/10.1016/S0926-6410(01)00026-X)
- 905 Saleem, A.B., Lien, A.D., Krumin, M., Haider, B., Rosón, M.R., Ayaz, A., Reinhold, K., Busse,  
906 L., Carandini, M., Harris, K.D., Carandini, M., 2017. Subcortical Source and  
907 Modulation of the Narrowband Gamma Oscillation in Mouse Visual Cortex. *Neuron*  
908 93, 315–322. <https://doi.org/10.1016/j.neuron.2016.12.028>
- 909 Sanchez-Vives, M. V., Nowak, L.G., McCormick, D.A., 2000. Cellular mechanisms of long-  
910 lasting adaptation in visual cortical neurons in vitro. *J. Neurosci.* 20, 4286–4299.  
911 <https://doi.org/10.1523/jneurosci.20-11-04286.2000>

- 912 Sassenhagen, J., Draschkow, D., 2019. Cluster-based permutation tests of MEG/EEG data  
913 do not establish significance of effect latency or location. *Psychophysiology* 56, 1–8.  
914 <https://doi.org/10.1111/psyp.13335>
- 915 Sato, Y., Yabe, H., Hiruma, T., Sutoh, T., Shinozaki, N., Nashida, T., Kaneko, S., 2000. The  
916 effect of deviant stimulus probability on the human mismatch process. *Neuroreport*  
917 11, 3703–3708. <https://doi.org/10.1097/00001756-200011270-00023>
- 918 Sculthorpe, L.D., Ouellet, D.R., Campbell, K.B., 2009. MMN elicitation during natural sleep  
919 to violations of an auditory pattern. *Brain Res.* 1290, 52–62.  
920 <https://doi.org/10.1016/j.brainres.2009.06.013>
- 921 Senzai, Y., Fernandez-Ruiz, A., Buzsáki, G., 2019. Layer-Specific Physiological Features  
922 and Interlaminar Interactions in the Primary Visual Cortex of the Mouse. *Neuron*  
923 101, 500–513.e5. <https://doi.org/10.1016/j.neuron.2018.12.009>
- 924 Sohya, K., Kameyama, K., Yanagawa, Y., Obata, K., Tsumoto, T., 2007. GABAergic neurons  
925 are less selective to stimulus orientation than excitatory neurons in layer II/III of  
926 visual cortex, as revealed by in vivo functional Ca<sup>2+</sup> imaging in transgenic mice. *J.*  
927 *Neurosci.* 27, 2145–2149. <https://doi.org/10.1523/JNEUROSCI.4641-06.2007>
- 928 Solomon, S.G., Kohn, A., 2014. Moving Sensory Adaptation beyond Suppressive Effects in  
929 Single Neurons. *Curr. Biol.* 24, R1012–R1022.  
930 <https://doi.org/10.1016/j.cub.2014.09.001.Moving>
- 931 Stagg, C., Hindley, P., Tales, A., Butler, S., 2004. Visual mismatch negativity: the detection  
932 of stimulus change. *Neuroreport* 15, 487–491.  
933 <https://doi.org/10.1097/01.wnr.00001>
- 934 Stothart, G., Kazanina, N., 2013. Oscillatory characteristics of the visual mismatch

- 935           negativity; what evoked potentials aren't telling us. *Front. Hum. Neurosci.* 7, 1–9.
- 936           <https://doi.org/10.3389/fnhum.2013.00426>
- 937   Sulykos, I., Czigler, I., 2014. Visual mismatch negativity is sensitive to illusory brightness
- 938           changes. *Brain Res.* 1561, 48–59. <https://doi.org/10.1016/j.brainres.2014.03.008>
- 939   Suzuki, T.H., Nunokawa, S., Jacobson, J.H., 1972. Visually evoked cortical response in
- 940           light-adapted cat and liminal brightness discrimination. *Jpn. J. Physiol.* 22, 157–175.
- 941   Tada, M., Kirihara, K., Mizutani, S., Uka, T., Kunii, N., Koshiyama, D., Fujioka, M., Usui, K.,
- 942           Nagai, T., Araki, T., Kasai, K., 2019. Mismatch negativity (MMN) as a tool for
- 943           translational investigations into early psychosis: A review. *Int. J. Psychophysiol.*
- 944           145, 5–14. <https://doi.org/10.1016/j.ijpsycho.2019.02.009>
- 945   Van Diepen, H.C., Ramkisoensing, A., Peirson, S.N., Foster, R.G., Meijer, J.H., 2013.
- 946           Irradiance encoding in the suprachiasmatic nuclei by rod and cone photoreceptors.
- 947           *FASEB J.* 27, 4204–4212. <https://doi.org/10.1096/fj.13-233098>
- 948   Vinken, K., Vogels, R., Op de Beeck, H., 2017. Recent Visual Experience Shapes Visual
- 949           Processing in Rats through Stimulus-Specific Adaptation and Response
- 950           Enhancement. *Curr. Biol.* 27, 914–919. <https://doi.org/10.1016/j.cub.2017.02.024>
- 951   Vogt, D., Cho, K.K.A., Lee, A.T., Sohal, V.S., Rubenstein, J.L.R., 2015. The
- 952           Parvalbumin/Somatostatin Ratio Is Increased in Pten Mutant Mice and by Human
- 953           PTEN ASD Alleles. *Cell Rep.* 11, 944–956.
- 954           <https://doi.org/10.1016/j.celrep.2015.04.019>
- 955   Warden, M.R., Cardin, J.A., Deisseroth, K., 2014. Optical neural interfaces. *Annu. Rev.*
- 956           *Biomed. Eng.* 16, 103–129. [https://doi.org/10.1146/annurev-bioeng-071813-](https://doi.org/10.1146/annurev-bioeng-071813-104733)
- 957           104733

958 Yan, T., Feng, Y., Liu, T., Wang, L., Mu, N., Dong, X., Liu, Z., Qin, T., Tang, X., Zhao, L., 2017.

959 Theta oscillations related to orientation recognition in unattended condition: A

960 vMMN study. *Front. Behav. Neurosci.* 11, 1–8.

961 <https://doi.org/10.3389/fnbeh.2017.00166>

962 Yizhar, O., Fenno, L.E., Prigge, M., Schneider, F., Davidson, T.J., Shea, D.J.O., Sohal, V.S.,

963 Goshen, I., Finkelstein, J., Paz, J.T., Stehfest, K., Fudim, R., Ramakrishnan, C.,

964 Huguenard, J.R., Hegemann, P., Deisseroth, K., 2011. Neocortical excitation /

965 inhibition balance in information processing and social dysfunction. *Nature* 477,

966 171–178. <https://doi.org/10.1038/nature10360>

967 Yucel, G., McCarthy, G., Belger, A., 2007. fMRI reveals that involuntary visual deviance

968 processing is resource limited. *Neuroimage* 34, 1245–1252.

969 <https://doi.org/10.1016/j.neuroimage.2006.08.050>

970 Zhang, D., Yu, B., Liu, J., Jiang, W., Xie, T., Zhang, R., Tong, D., Qiu, Z., Yao, H., 2017. Altered

971 visual cortical processing in a mouse model of MECP2 duplication syndrome. *Sci.*

972 *Rep.* 7, 1–14. <https://doi.org/10.1038/s41598-017-06916-3>

973

974

975 **Supplementary figures**

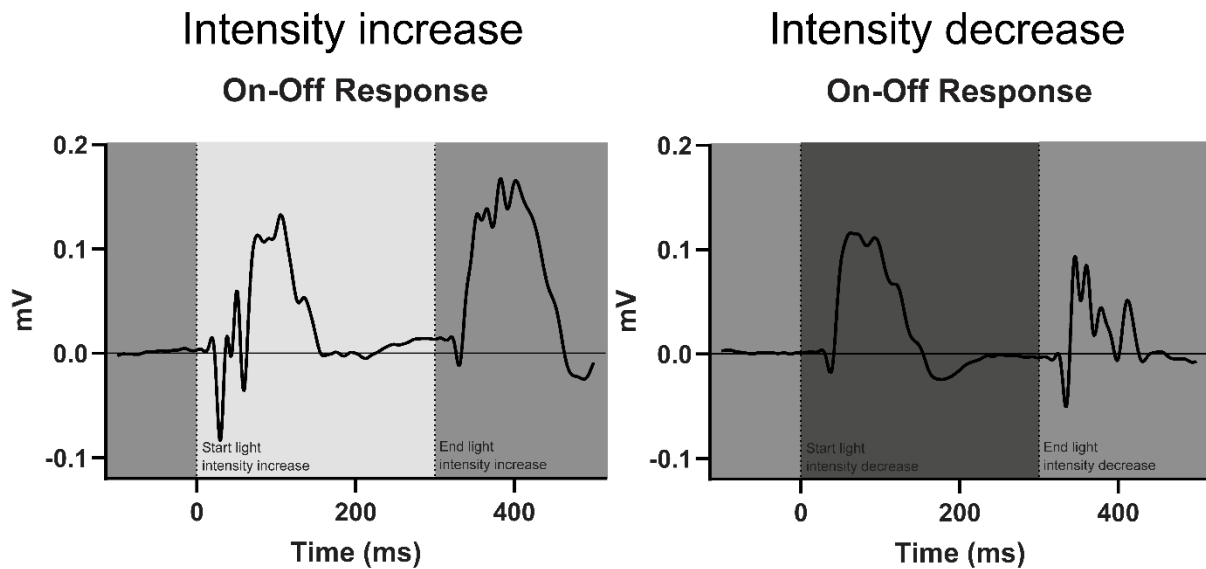

977

978 **Figure S1. Comparison of VEP waveforms for the On- and Off-responses to light intensity increase**  
979 **versus light intensity decrease.** Light stimuli lasted for 300 ms, whereby these plots show the 'On-  
980 response' to the start of the 300-ms intensity increase or decrease as well as the VEP 'Off-response' to the  
981 light intensity changing back to baseline level. The On-response of the light increase, as well as the Off-  
982 response of the light decrease, concern a response to an increase in light intensity. The On-response of the  
983 light decrease, as well as the Off-response of the light increase, concern a response to a light intensity  
984 decrease. Presented data show the responses to a light increase and decrease, averaged over all mice for  
985 right and left V1 responses and 2 recordings on separate days.
